# Supplementary material
Source: publisher figshare collection journal article supplement (https://acs.figshare.com/ndownloader/files/5727279)
Supplement: Supplementary file 1 [file 5727279]

*Supporting Information for*  
**Effects of the Protein Environment on the Structure and Energetics of Active Sites of Metalloenzymes.**  
**ONIOM Study of Methane Monooxygenase and Ribonucleotide Reductase.**

Maricel Torrent, Thom Vreven, Djamaladdin G. Musaev, Keiji Morokuma\*

*Cherry L. Emerson for Scientific Computation and Department of Chemistry, Emory University, Atlanta, Georgia 30322.*

Ödön Farkas, H. Bernhard Schlegel

*Department of Chemistry, Wayne State University, Detroit, Michigan 48202.*

J. Am. Chem. Soc., **2001**, 123, xxx-xxx.

List of added Amber parameters for link atoms (“A” type = link atoms in carboxylate-like moieties; “B” type = link atoms in imidazole moieties):

$K_r(H_A-C) = 367.0$ ,  $r_{eq}(H_A) = 1.080$ ,  $K_\theta(H_A) = 70.0$ ,  $\theta_{eq}(H_A-C-O2) = 117.0$ ,  $V_n/2(H_A) = 10.5$ ,  $\gamma(H_A) = 180.0$ ,  $R(H_A) = 1.2870$ ,  $\epsilon(H_A) = 0.0157$

$K_r(H_B-C) = 367.0$ ,  $r_{eq}(H_B) = 1.080$ ,  $K_\theta(H_B) = 70.0$ ,  $\theta_{eq}(H_B-CC-NB) = 120.0$ ,  $\theta_{eq}(H_B-CC-CW) = 120.0$ ,  $V_n/2(H_B) = 1.1$ ,  $\gamma(H_B) = 180.0$ ,  $R(H_B) = 1.4090$ ,  $\epsilon(H_B) = 0.0150$ .

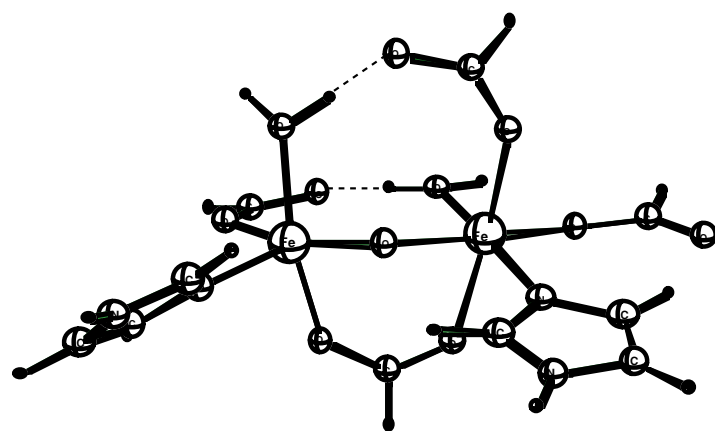

R2<sub>met</sub>

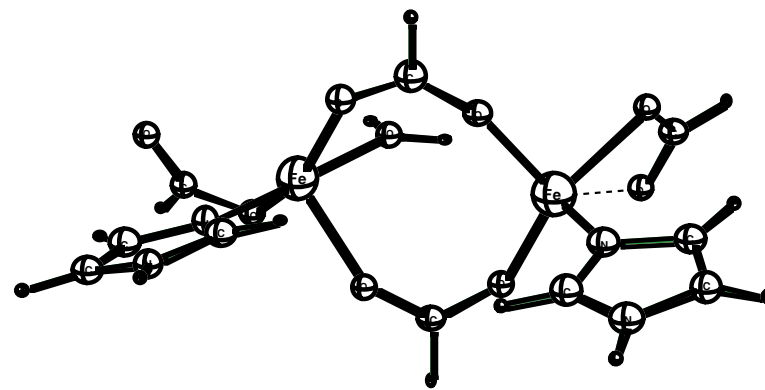

R2<sub>red</sub>

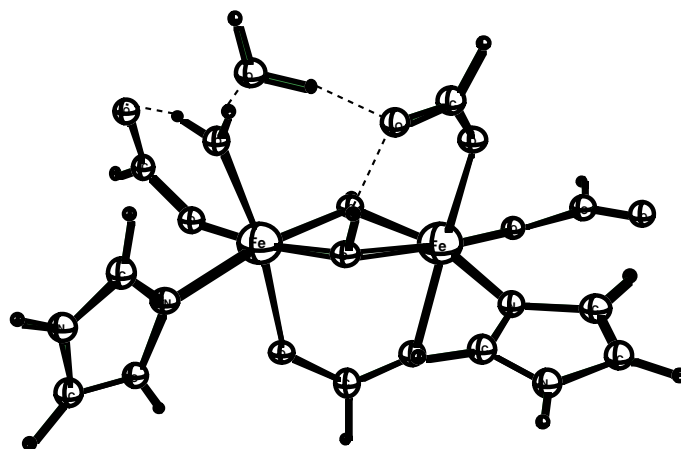

MMOH<sub>ox</sub>

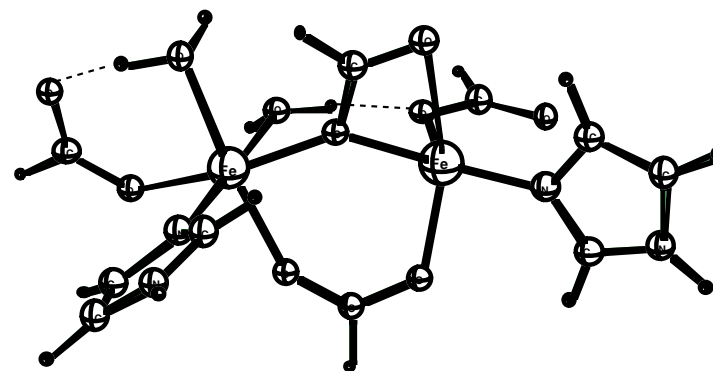

MMOH<sub>red</sub>

**Figure S1.** Biomolecular models for the active sites of R2 (top) and MMOH (bottom) including only the first-shell ligands.

## R2<sub>met</sub> - Comparison of optimized active sites with X-ray

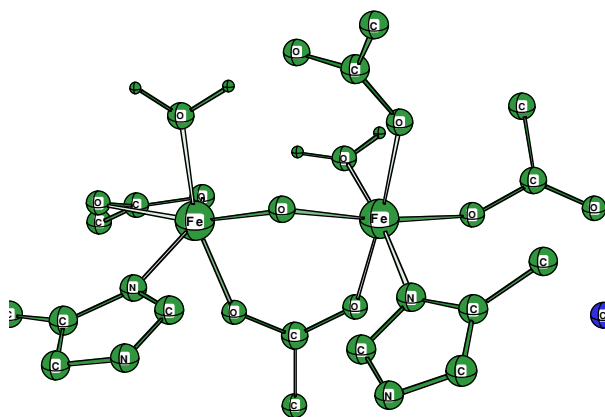

**ONIOM(QM:MM)**  
with selected MM atoms frozen

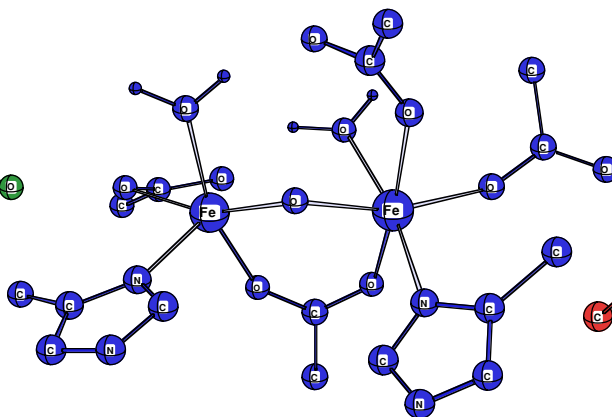

**Experimental**  
(X-ray)

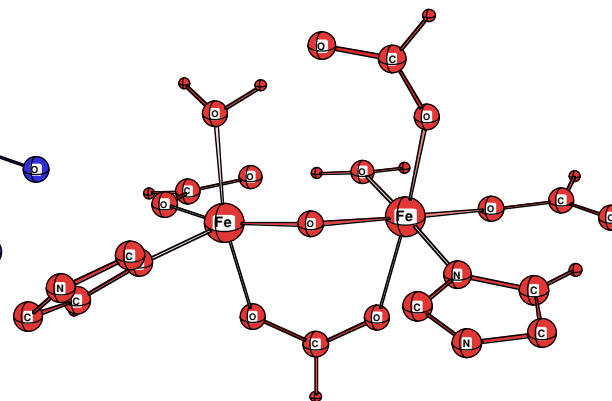

**Pure QM**  
(small model)

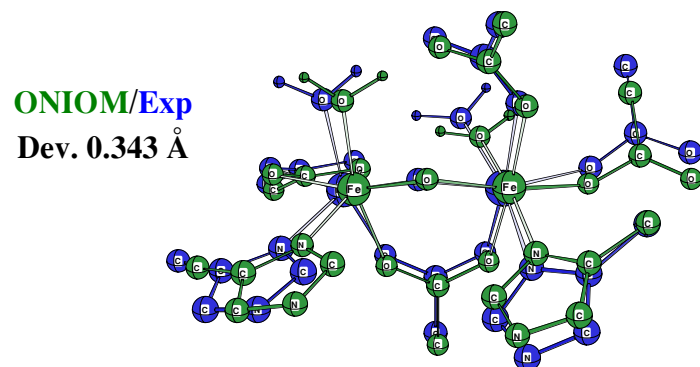

**ONIOM/Exp**  
Dev. 0.343 Å

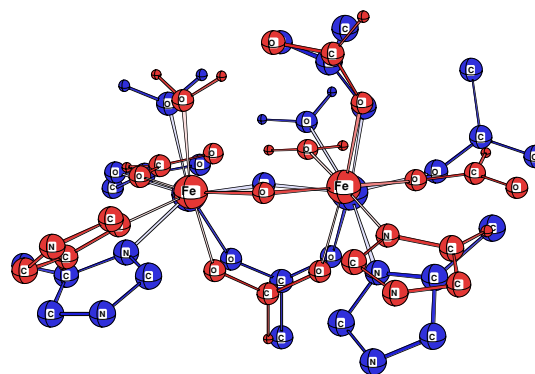

**QM/Exp**  
Dev. 0.796 Å
